# Supplementary material
Source: PubMed Central journal article supplement (PMC7614488)
Supplement: EMS174063-supplement-Supplemental_Tables.pdf [file EMS174063-supplement-Supplemental_Tables.pdf]

# Supplemental Tables

## Supplemental Table 1: Methods for the identification of RNA binding sites of RBPs

CLIP methods are listed detailing how the reads are used to identify binding sites.

## Supplemental Table 2: Peak calling tools

Peak calling tools are ordered by date of publication to reflect development in methodologies and technologies. A brief description and web link is given.

## Supplemental Table 3: Tools for the analysis and visualisation of CLIP derived binding sites

Other tools relevant for CLIP data analysis are categorised into: i) motif finding, ii) binding site modelling, iii) databases, iv) visualisation and v) miscellaneous with a brief description and web link.

Supplemental Table 1: Methods for the identification of RNA binding sites of RBPs

| Acronym    | Full Name                                                                                    | Citation | Analysis based on |
|------------|----------------------------------------------------------------------------------------------|----------|-------------------|
| BrdU CLIP  | Bromodeoxyuridine UV CLIP                                                                    | (1)      | read start        |
| CIMS       | Crosslink-induced mutation site analysis                                                     | (2)      | deletions in read |
| CLIP       | (UV) Crosslinking and immunoprecipitation                                                    | (3)      | full read         |
| CLIP-seq   | Crosslinking immunoprecipitation coupled with high-throughput sequencing                     | (4)      | full read         |
| CRAC       | UV cross-linking and analysis of cDNAs                                                       | (5)      | full read         |
| eCLIP      | Enhanced CLIP                                                                                | (6)      | read start        |
| FAST-iCLIP | Fully automated and standardized iCLIP                                                       | (7)      | read start        |
| FLASH      | Fast ligation of RNA after some sort of affinity purification for high-throughput sequencing | (8)      | read start        |
| Fr-iCLIP   | Fractionation iCLIP                                                                          | (9)      | read start        |
| HITS-CLIP  | High-throughput sequencing of RNA isolated by crosslinking immunoprecipitation               | (10)     | full read         |

|            |                                                                                 |      |                     |
|------------|---------------------------------------------------------------------------------|------|---------------------|
| iCLIP      | Individual-nucleotide resolution CLIP                                           | (11) | read start          |
| iCLAP      | Individual-nucleotide resolution crosslinking and affinity purification         | (12) | read start          |
| irCLIP     | Infrared-CLIP                                                                   | (13) | read start          |
| PAR-CLIP   | Photoactivatable ribonucleoside-enhanced CLIP                                   | (14) | transitions in read |
| 4SU-iCLIP  | 4SU-enhanced iCLIP                                                              | (15) | read start          |
| RIP-seq    | RNP (or RNA) immunoprecipitation followed by sequencing                         | (16) | full read           |
| RIP-iT-seq | RNA:protein immunoprecipitation in tandem coupled to high-throughput sequencing | (17) | full read           |
| DO-RIP-seq | Digestion optimised RNA immunoprecipitation with deep sequencing                | (18) | full read           |
| sCLIP      | Simplified CLIP                                                                 | (19) | read start          |
| uvCLAP     | UV crosslinking and affinity purification                                       | (8)  | read start          |

## Supplemental Table 2: Peak calling tools

| Name               | Description                                                                                                                                                                                                                                                                                                                                                                                                                                                                                                                                                                                                                                                                                                                                                                                                                                              | Link                                                                                                                                                                                                                                                              |
|--------------------|----------------------------------------------------------------------------------------------------------------------------------------------------------------------------------------------------------------------------------------------------------------------------------------------------------------------------------------------------------------------------------------------------------------------------------------------------------------------------------------------------------------------------------------------------------------------------------------------------------------------------------------------------------------------------------------------------------------------------------------------------------------------------------------------------------------------------------------------------------|-------------------------------------------------------------------------------------------------------------------------------------------------------------------------------------------------------------------------------------------------------------------|
| iCount<br>(11, 20) | <p>iCount package includes a peak caller for nucleotide-resolution methods using false discovery rate with local randomisation. It allows adjustments of three variables: 1. Randomisation within local regions (intergenic, UTR3, UTR5, ncRNA, intron, CDS) or within whole genes, 2. The length of the flanking region around each position to define cluster of significantly crosslinked sites. 3. The length of window used to combine proximal crosslink clusters.</p> <p><i>Pros: The method exploits the nucleotide resolution of truncated cDNAs, and its enables to search for cluster of a broad size range (variable flank and window regions, as explained in the text).</i></p> <p><i>Cons: Normalisation by RNA-seq or other control data is not yet implemented.</i></p> <p><i>It can be slow because of the randomisation step.</i></p> | <p><a href="https://github.com/tomazc/iCount">https://github.com/tomazc/iCount</a></p> <p><a href="http://icount.biolab.si">http://icount.biolab.si</a></p> <p><a href="https://imaps.genialis.com">https://imaps.genialis.com</a> (<i>under development</i>)</p> |

|                            |                                                                                                                                                                                                                                                                                                                                                         |                                                                                                                                                              |
|----------------------------|---------------------------------------------------------------------------------------------------------------------------------------------------------------------------------------------------------------------------------------------------------------------------------------------------------------------------------------------------------|--------------------------------------------------------------------------------------------------------------------------------------------------------------|
| <p>PARalyzer<br/>(21)</p>  | <p>For PAR-CLIP only. Uses a kernel density estimator to profile mutations and background. Compares the difference to call binding sites.</p> <p><i>Pros: Widely used tool for PAR-CLIP analysis</i></p> <p><i>Cons: Valid mutations selected by a threshold rather than modelling</i></p>                                                              | <p><a href="http://www.genome.duke.edu/labs/ohler/research/PARalyzer/">http://www.genome.duke.edu/labs/ohler/research/PARalyzer/</a>.</p>                    |
| <p>wavClusteR<br/>(22)</p> | <p>Uses a non-parametric, two component mixture model to distinguish crosslink mutations from noise. Uses a coverage-based algorithm, Mini-Rank Norm to identify peak boundaries.</p>                                                                                                                                                                   | <p><a href="https://bioconductor.org/packages/release/bioc/html/wavClusteR.html">https://bioconductor.org/packages/release/bioc/html/wavClusteR.html</a></p> |
| <p>Piranha<br/>(23)</p>    | <p>Uses zero-truncated negative binomial distribution as the recommended setting. RNA-seq data, or information about covariates can be included in the model.</p> <p><i>Pros: Very fast. Can account for confounders or transcript abundance in peak calling process</i></p> <p><i>Cons: Does not support peak calling based on genomic region.</i></p> | <p><a href="http://smithlabresearch.org/software/piranha/">http://smithlabresearch.org/software/piranha/</a></p>                                             |

|                                       |                                                                                                                                                                                                                                                                                                                                                           |                                                                                                                                    |
|---------------------------------------|-----------------------------------------------------------------------------------------------------------------------------------------------------------------------------------------------------------------------------------------------------------------------------------------------------------------------------------------------------------|------------------------------------------------------------------------------------------------------------------------------------|
| <p>ASPeak<br/>(24)</p>                | <p>Uses a negative binomial distribution. RNA-seq data can be supplied for normalisation.</p> <p><i>Pros: Fast and can be parallelised. Local normalisation by genomic regions together with RNA-seq.</i></p> <p><i>Cons: For the single nucleotide resolution methods the data needs to be preprocessed to set the right crosslinking positions.</i></p> | <p><a href="https://sourceforge.net/projects/as-peak/">https://sourceforge.net/projects/as-peak/</a></p>                           |
| <p>CLIP Tool<br/>Kit<br/>(25, 26)</p> | <p>Defines the crosslink sites using CIMS and CITS analysis. Uses a 'valley-seeking' algorithm to delineate adjacent peaks</p>                                                                                                                                                                                                                            | <p><a href="http://zhanglab.c2b2.columbia.edu/index.php/CTK">http://zhanglab.c2b2.columbia.edu/index.php/CTK</a></p>               |
| <p>MiCLIP<br/>(27)</p>                | <p>Uses a two-pass hidden Markov model first to identify enriched CLIP clusters and second to identify reliable binding sites within the clusters.</p>                                                                                                                                                                                                    | <p><a href="https://cran.r-project.org/src/contrib/Archive/MiClip/">https://cran.r-project.org/src/contrib/Archive/MiClip/</a></p> |
| <p>PIPE-CLIP<br/>(28)</p>             | <p>Uses a zero-truncated negative binomial distribution.</p>                                                                                                                                                                                                                                                                                              | <p><a href="https://github.com/QBRC/PIPE-CLIP">https://github.com/QBRC/PIPE-CLIP</a></p>                                           |

|                    |                                                                                                                                                                                                                                                                                    |                                                                                                                                                             |
|--------------------|------------------------------------------------------------------------------------------------------------------------------------------------------------------------------------------------------------------------------------------------------------------------------------|-------------------------------------------------------------------------------------------------------------------------------------------------------------|
|                    | <p><i>Pros: Applicable to readthrough, mutation and truncation methods. For mutation methods, models events using a binomial distribution.</i></p> <p><i>Cons: Clusters adjacent reads, rather than specifying a window</i></p>                                                    |                                                                                                                                                             |
| PyCRAC<br>(29)     | Identifies significantly enriched regions by calculating false discovery rates                                                                                                                                                                                                     | <a href="http://sandergranneman.bio.ed.ac.uk/Granneman_Lab/pyCRAC_software.html">http://sandergranneman.bio.ed.ac.uk/Granneman_Lab/pyCRAC_software.html</a> |
| CLIPper<br>(6, 30) | <p>Peak caller using false discovery rate with local randomisation followed by Poisson distribution count modelling.</p> <p><i>Pros: Supports normalisation by genomic region and combines two methods used in other tools.</i></p> <p><i>Cons: Slow and needs annotation.</i></p> | <a href="https://github.com/YeoLab/clipper">https://github.com/YeoLab/clipper</a>                                                                           |
| OmniCLIP<br>(31)   | In development. Uses a Bayesian model to account for confounding factors                                                                                                                                                                                                           | <a href="https://github.com/philippdre/omniCLIP">https://github.com/philippdre/omniCLIP</a>                                                                 |
| PureCLIP<br>(32)   | Uses a hidden Markov model to incorporate RNA abundance and non-specific sequence bias                                                                                                                                                                                             | <a href="https://github.com/skrakau/PureCLIP">https://github.com/skrakau/PureCLIP</a>                                                                       |

Supplemental Table 3: Tools for the analysis and visualisation of CLIP-derived binding sites

|               | Name            | Description                                                                                                        | Link                                                                                                                                                            |
|---------------|-----------------|--------------------------------------------------------------------------------------------------------------------|-----------------------------------------------------------------------------------------------------------------------------------------------------------------|
| Motif finding | MEMERIS<br>(33) | Adapts the MEME expectation maximisation motif finding algorithm by including the single-strandness of the region. | <a href="http://www.bioinf.uni-freiburg.de/~hiller/MEMERIS/">http://www.bioinf.uni-freiburg.de/~hiller/MEMERIS/</a>                                             |
|               | HOMER<br>(34)   | Designed for ChIP-seq. Scores occurrences of motifs and uses a hypergeometric enrichment calculation               | <a href="http://homer.ucsd.edu/homer/">http://homer.ucsd.edu/homer/</a>                                                                                         |
|               | DREME<br>(35)   | Designed for ChIP-seq. Uses an expectation maximisation approach                                                   | <a href="http://meme-suite.org/tools/dreme">http://meme-suite.org/tools/dreme</a>                                                                               |
|               | cERMIT<br>(36)  | Utilises quantitative data to rank regions then identifies enriched motifs.                                        | <a href="https://ohlerlab.mdc-berlin.de/software/PAR-CLIP_motif_analysis_tool_87/">https://ohlerlab.mdc-berlin.de/software/PAR-CLIP_motif_analysis_tool_87/</a> |
|               | RNAcontext/     | Trains a model that includes secondary structural                                                                  | <a href="http://www.rnamotif.org/">http://www.rnamotif.org/</a>                                                                                                 |



|                        |                                                                                                                    |                                                                                                           |
|------------------------|--------------------------------------------------------------------------------------------------------------------|-----------------------------------------------------------------------------------------------------------|
| RBPmotif<br>(37)       | context to assess enrichment of a motif.                                                                           |                                                                                                           |
| Zagros<br>(38)         | Includes sequence, pairing probability and crosslink events and learns these using expectation maximisation        | <a href="http://smithlabresearch.org/software/zagros/">http://smithlabresearch.org/software/zagros/</a>   |
| RNAmotifs2<br>(39, 40) | Compares motifs around regulated and control features. Uses a Fisher test and adjusts for the false discovery rate | <a href="https://github.com/grexor/rnamotifs2">https://github.com/grexor/rnamotifs2</a>                   |
| kpLogo<br>(41)         | Focuses on identifying position-specific short motifs based on enrichment                                          | <a href="http://kplogo.wi.mit.edu/">http://kplogo.wi.mit.edu/</a>                                         |
| ssHMM<br>(42)          | Uses a hidden Markov model and Gibbs sampling to include the relationship between sequence and structure.          | <a href="https://github.com/molgen.mpg.de/heller/ssHMM">https://github.com/molgen.mpg.de/heller/ssHMM</a> |
| SMARTIV<br>(43)        | Uses a <i>k</i> -mer based approach to extract sequence and structure motifs from ranked                           | <a href="http://smartiv.technion.ac.il/">http://smartiv.technion.ac.il/</a>                               |

|                        |                     |                                                                                                                                                                                                                  |                                                                                                                           |
|------------------------|---------------------|------------------------------------------------------------------------------------------------------------------------------------------------------------------------------------------------------------------|---------------------------------------------------------------------------------------------------------------------------|
|                        |                     | regions.                                                                                                                                                                                                         |                                                                                                                           |
|                        | SARNAclust<br>(44)  | An unsupervised method that uses graph kernels to assess sequence and structure similarities and identify the feature importance.                                                                                | <a href="https://github.com/idotu/SARNAclust">https://github.com/idotu/SARNAclust</a>                                     |
| Binding site modelling | GraphProt<br>(45)   | Encodes $k$ -mer motifs and structural shapes as graph kernel features, including the interdependencies. Fits a model using Support Vector Machine or regression depending on the availability of affinity data. | <a href="http://www.bioinf.uni-freiburg.de/Software/GraphProt/">http://www.bioinf.uni-freiburg.de/Software/GraphProt/</a> |
|                        | iONMF<br>(46)       | Uses matrix factorisation to integrate multiple factors in order to identify discriminative non-overlapping, class-specific RNA binding patterns of different strengths                                          | <a href="https://github.com/mstrazar/iONMF">https://github.com/mstrazar/iONMF</a>                                         |
|                        | Deepnet-rbp<br>(47) | Uses a deep learning framework (multimodal deep belief networks) to to encode sequence, secondary structure and uniquely tertiary                                                                                | <a href="https://github.com/thucombio/deepnet-rbp">https://github.com/thucombio/deepnet-rbp</a>                           |

|           |                            |                                                                                                                                                                                                                                                                                  |                                                                                                                                                                              |
|-----------|----------------------------|----------------------------------------------------------------------------------------------------------------------------------------------------------------------------------------------------------------------------------------------------------------------------------|------------------------------------------------------------------------------------------------------------------------------------------------------------------------------|
|           |                            | structure predictions to generate RBP binding motifs and predictions                                                                                                                                                                                                             |                                                                                                                                                                              |
|           | iDeep (48)/<br>iDeepS (49) | Uses a deep learning framework (convolutional neural networks). IDeep can only discover sequence preferences whereas IDeepS also identifies structural motifs.                                                                                                                   | <a href="https://github.com/xypan1232/iDeep">https://github.com/xypan1232/iDeep</a><br><a href="https://github.com/xypan1232/iDeepS">https://github.com/xypan1232/iDeepS</a> |
|           | DeBooster<br>(50)          | Uses a deep boosting machine learning approach to model sequence binding preferences.                                                                                                                                                                                            | <a href="https://github.com/dongfanghong/deepboost">https://github.com/dongfanghong/deepboost</a>                                                                            |
| Databases | DoRiNA 2.0<br>(51)         | Includes RBP binding and miRNA target sites in a unified database. Includes 100 RBP datasets for human, 30 for M mouse and 6 for <i>C. elegans</i> . Integrated with the UCSC genome browser and allows the upload of the user's own data for queries. Does not re-process data. | <a href="http://dorina.mdc-berlin.de/">http://dorina.mdc-berlin.de/</a>                                                                                                      |
|           | CLIPdb2:                   | Includes both experimentally probed (498                                                                                                                                                                                                                                         | <a href="http://lulab.life.tsinghua.edu.cn/postar/">http://lulab.life.tsinghua.edu.cn/postar/</a>                                                                            |

|                        |                    |                                                                                                                                                                                                                                   |                                                                                                                                                                                                                                                      |
|------------------------|--------------------|-----------------------------------------------------------------------------------------------------------------------------------------------------------------------------------------------------------------------------------|------------------------------------------------------------------------------------------------------------------------------------------------------------------------------------------------------------------------------------------------------|
|                        | POSTAR<br>(52)     | CLIP-seq and 151 eCLIP) and computationally predicted binding sites. Includes systematic re-annotation of regions. Different peak callers used for different CLIP methods.                                                        |                                                                                                                                                                                                                                                      |
| Visualisation          | iCount<br>(11, 20) | A command-line tool to visualise metaprofiles (RNA maps) of crosslinking at splice sites, gene boundaries, ncRNAs, and other features.                                                                                            | <a href="https://github.com/tomazc/iCount">https://github.com/tomazc/iCount</a><br><a href="http://icount.biolab.si">http://icount.biolab.si</a>                                                                                                     |
|                        | rMAPS<br>(53)      | A web-server to produce RNA maps around alternatively spliced exons                                                                                                                                                               | <a href="http://rmaps.cecsresearch.org/">http://rmaps.cecsresearch.org/</a>                                                                                                                                                                          |
|                        | expressRNA<br>(40) | A web-server to examine RNA motifs and produce RNA maps                                                                                                                                                                           | <a href="http://www.expressrna.org/">http://www.expressrna.org/</a>                                                                                                                                                                                  |
| Miscellaneous analysis | iCount<br>(11, 20) | Apart from the peak caller, the iCount package also includes tools to demultiplex and map sequence data to the genome to define cross-link sites, quantify cDNAs at these sites based on UMIs, annotate the site, provide summary | <a href="https://github.com/tomazc/iCount">https://github.com/tomazc/iCount</a><br><a href="http://icount.biolab.si">http://icount.biolab.si</a><br><a href="https://imaps.genialis.com">https://imaps.genialis.com</a> ( <i>under development</i> ) |

|  |                                   |                                                                                                                                                                                                                                       |                                                                                                                      |
|--|-----------------------------------|---------------------------------------------------------------------------------------------------------------------------------------------------------------------------------------------------------------------------------------|----------------------------------------------------------------------------------------------------------------------|
|  |                                   | <p>statistics, identify enriched sequence motifs and analyse motif distribution around crosslink sites, and visualise metaprofiles (RNA maps) of crosslinking at splice sites, gene boundaries, ncRNAs, and other features.</p>       |                                                                                                                      |
|  | <p>CLIP Tool Kit<br/>(25, 26)</p> | <p>Apart from the peak caller, the CLIP Tool Kit provides a set of tools for analysis of CLIP data including pipelines to filter and map reads, collapse PCR duplicates to obtain unique CLIP tags, and define CLIP tag clusters.</p> | <p><a href="http://zhanglab.c2b2.columbia.edu/index.php/CTK">http://zhanglab.c2b2.columbia.edu/index.php/CTK</a></p> |
|  | <p>CapR<br/>(54)</p>              | <p>Calculates probabilities that an RNA base position is located within secondary structural context.</p>                                                                                                                             | <p><a href="https://github.com/fukunagatsu/CapR">https://github.com/fukunagatsu/CapR</a></p>                         |
|  | <p>dCLIP<br/>(55)</p>             | <p>dCLIP analyses differential binding regions in two CLIP experiments. As a hidden Markov model is used to detect common or unique binding</p>                                                                                       | <p><a href="http://qbrc.swmed.edu/software/">http://qbrc.swmed.edu/software/</a></p>                                 |

|  |                      |                                                                                                                                                                                               |                                                                                                                                                             |
|--|----------------------|-----------------------------------------------------------------------------------------------------------------------------------------------------------------------------------------------|-------------------------------------------------------------------------------------------------------------------------------------------------------------|
|  |                      | regions, this is more appropriate for assessing relative binding at a common site, rather than the presence or absence of binding.                                                            |                                                                                                                                                             |
|  | PAR-CLIP HMM<br>(56) | Uses a Bayesian hidden Markov model to identify PAR-CLIP mutation sites by establishing a joint distribution of read and mutation counts.                                                     | <a href="https://qbrc.swmed.edu/software.php">https://qbrc.swmed.edu/software.php</a>                                                                       |
|  | PyCRAC<br>(29)       | A suite of Python scripts which can be used to analyze HITS-CLIP, PAR-CLIP or CRAC data and many other types of data.                                                                         | <a href="http://sandergranneman.bio.ed.ac.uk/Granneman_Lab/pyCRAC_software.html">http://sandergranneman.bio.ed.ac.uk/Granneman_Lab/pyCRAC_software.html</a> |
|  | BackCLIP<br>(57)     | Identifies common non-specific background in PAR-CLIP data.                                                                                                                                   | <a href="https://github.com/phrh/BackCLIP">https://github.com/phrh/BackCLIP</a>                                                                             |
|  | iCLIPPro<br>(58)     | Can be used to control for systematic mis-assignments in iCLIP data by visualising coinciding and non-coinciding fragment start sites in order to examine the best way to analyze iCLIP data. | <a href="http://www.biolab.si/iCLIPPro/doc/">http://www.biolab.si/iCLIPPro/doc/</a>                                                                         |

|  |              |                                                                                                                    |                                                                                 |
|--|--------------|--------------------------------------------------------------------------------------------------------------------|---------------------------------------------------------------------------------|
|  | BMix<br>(59) | Uses a constrained three-component binomial mixture model to identify high confidence mutations in PAR-CLIP reads. | <a href="https://github.com/cbg-ethz/BMix">https://github.com/cbg-ethz/BMix</a> |
|--|--------------|--------------------------------------------------------------------------------------------------------------------|---------------------------------------------------------------------------------|

## Literature cited

1. Weyn-Vanhentenryck SM, Mele A, Yan Q, Sun S, Farny N, et al. 2014. HITS-CLIP and integrative modeling define the Rbfox splicing-regulatory network linked to brain development and autism. *Cell Rep.* 6(6):1139–52
2. Zhang C, Darnell RB. 2011. Mapping in vivo protein-RNA interactions at single-nucleotide resolution from HITS-CLIP data. *Nat. Biotechnol.* 29(7):607–14
3. Ule J, Jensen KB, Ruggiu M, Mele A, Ule A, Darnell RB. 2003. CLIP identifies Nova-regulated RNA networks in the brain. *Science.* 302(5648):1212–15
4. Yeo GW, Coufal NG, Liang TY, Peng GE, Fu X-D, Gage FH. 2009. An RNA code for the FOX2 splicing regulator revealed by mapping RNA-protein interactions in stem cells. *Nat. Struct. Mol. Biol.* 16(2):130–37
5. Granneman S, Kudla G, Petfalski E, Tollervey D. 2009. Identification of protein binding sites on U3 snoRNA and pre-rRNA by UV cross-linking and high-throughput analysis of cDNAs. *Proc. Natl. Acad. Sci. U. S. A.* 106(24):9613–18
6. Van Nostrand EL, Pratt GA, Shishkin AA, Gelboin-Burkhart C, Fang MY, et al. 2016. Robust transcriptome-wide discovery of RNA-binding protein binding sites with enhanced CLIP (eCLIP). *Nat. Methods.* 13(6):508–14
7. Flynn RA, Martin L, Spitale RC, Do BT, Sagan SM, et al. 2015. Dissecting noncoding and pathogen RNA-protein interactomes. *RNA.* 21(1):135–43
8. Aktaş T, Avşar Ilık İ, Maticzka D, Bhardwaj V, Pessoa Rodrigues C, et al. 2017. DHX9 suppresses RNA processing defects originating from



the Alu invasion of the human genome. *Nature*. 544(7648):115–19

9. Brugiolo M, Botti V, Liu N, Müller-McNicoll M, Neugebauer KM. 2017. Fractionation iCLIP detects persistent SR protein binding to conserved, retained introns in chromatin, nucleoplasm and cytoplasm. *Nucleic Acids Res*. doi: 10.1093/nar/gkx671
10. Licatalosi DD, Mele A, Fak JJ, Ule J, Kayikci M, et al. 2008. HITS-CLIP yields genome-wide insights into brain alternative RNA processing. *Nature*. 456(7221):464–69
11. König J, Zarnack K, Rot G, Curk T, Kayikci M, et al. 2010. iCLIP reveals the function of hnRNP particles in splicing at individual nucleotide resolution. *Nat. Struct. Mol. Biol.* 17(7):909–15
12. Wang Z, Kayikci M, Briese M, Zarnack K, Luscombe NM, et al. 2010. iCLIP predicts the dual splicing effects of TIA-RNA interactions. *PLoS Biol.* 8(10):e1000530
13. Zarnegar BJ, Flynn RA, Shen Y, Do BT, Chang HY, Khavari PA. 2016. irCLIP platform for efficient characterization of protein-RNA interactions. *Nat. Methods*. 13(6):489–92
14. Hafner M, Landthaler M, Burger L, Khorshid M, Hausser J, et al. 2010. Transcriptome-wide identification of RNA-binding protein and microRNA target sites by PAR-CLIP. *Cell*. 141(1):129–41
15. Haberman N, Huppertz I, Attig J, König J, Wang Z, et al. 2017. Insights into the design and interpretation of iCLIP experiments. *Genome Biol.* 18(1):7
16. Zhao J, Ohsumi TK, Kung JT, Ogawa Y, Grau DJ, et al. 2010. Genome-wide identification of polycomb-associated RNAs by RIP-seq. *Mol. Cell*. 40(6):939–53
17. Singh G, Ricci EP, Moore MJ. 2014. RIPiT-Seq: a high-throughput approach for footprinting RNA:protein complexes. *Methods*. 65(3):320–32

18. Nicholson CO, Friedersdorf MB, Bisogno LS, Keene JD. 2017. DO-RIP-seq to quantify RNA binding sites transcriptome-wide. *Methods*. 118-119:16–23
19. Kargapolova Y, Levin M, Lackner K, Danckwardt S. 2017. sCLIP-an integrated platform to study RNA-protein interactomes in biomedical research: identification of CSTF2tau in alternative processing of small nuclear RNAs. *Nucleic Acids Res*. 45(10):6074–86
20. Curk T, Rot G, Gorup C, Zmrzlikar J, König J, et al. 2017. iCount: protein-RNA interaction iCLIP data analysis. (*in preparation*)
21. Corcoran DL, Georgiev S, Mukherjee N, Gottwein E, Skalsky RL, et al. 2011. PARalyzer: definition of RNA binding sites from PAR-CLIP short-read sequence data. *Genome Biol*. 12(8):R79
22. Sievers C, Schlumpf T, Sawarkar R, Comoglio F, Paro R. 2012. Mixture models and wavelet transforms reveal high confidence RNA-protein interaction sites in MOV10 PAR-CLIP data. *Nucleic Acids Res*. 40(20):e160
23. Uren PJ, Bahrami-Samani E, Burns SC, Qiao M, Karginov FV, et al. 2012. Site identification in high-throughput RNA-protein interaction data. *Bioinformatics*. 28(23):3013–20
24. Kucukural A, Özadam H, Singh G, Moore MJ, Cenik C. 2013. ASPeak: an abundance sensitive peak detection algorithm for RIP-Seq. *Bioinformatics*. 29(19):2485–86
25. Moore MJ, Zhang C, Gantman EC, Mele A, Darnell JC, Darnell RB. 2014. Mapping Argonaute and conventional RNA-binding protein interactions with RNA at single-nucleotide resolution using HITS-CLIP and CIMS analysis. *Nat. Protoc*. 9(2):263–93
26. Shah A, Qian Y, Weyn-Vanhentenryck SM, Zhang C. 2017. CLIP Tool Kit (CTK): a flexible and robust pipeline to analyze CLIP sequencing data. *Bioinformatics*. 33(4):566–67
27. Wang T, Chen B, Kim M, Xie Y, Xiao G. 2014. A model-based approach to identify binding sites in CLIP-Seq data. *PLoS One*. 9(4):e93248

28. Chen B, Yun J, Kim MS, Mendell JT, Xie Y. 2014. PIPE-CLIP: a comprehensive online tool for CLIP-seq data analysis. *Genome Biol.* 15(1):R18
29. Webb S, Hector RD, Kudla G, Granneman S. 2014. PAR-CLIP data indicate that Nrd1-Nab3-dependent transcription termination regulates expression of hundreds of protein coding genes in yeast. *Genome Biol.* 15(1):R8
30. Lovci MT, Ghanem D, Marr H, Arnold J, Gee S, et al. 2013. Rbfox proteins regulate alternative mRNA splicing through evolutionarily conserved RNA bridges. *Nat. Struct. Mol. Biol.* 20(12):1434–42
31. Drewe-Boss P, Wessels H-H, Ohler U. 2017. omniCLIP: Bayesian identification of protein-RNA interactions from CLIP-Seq data. *bioRxiv*. doi: 10.1101/161877
32. Krakau S, Richard H, Marsico A. 2017. PureCLIP: capturing target-specific protein-RNA interaction footprints from single-nucleotide CLIP-seq data. *Genome Biol.* 18(1):240
33. Hiller M, Pudimat R, Busch A, Backofen R. 2006. Using RNA secondary structures to guide sequence motif finding towards single-stranded regions. *Nucleic Acids Res.* 34(17):e117
34. Heinz S, Benner C, Spann N, Bertolino E, Lin YC, et al. 2010. Simple combinations of lineage-determining transcription factors prime cis-regulatory elements required for macrophage and B cell identities. *Mol. Cell.* 38(4):576–89
35. Bailey TL. 2011. DREME: motif discovery in transcription factor ChIP-seq data. *Bioinformatics.* 27(12):1653–59
36. Georgiev S, Boyle AP, Jayasurya K, Ding X, Mukherjee S, Ohler U. 2010. Evidence-ranked motif identification. *Genome Biol.* 11(2):R19
37. Kazan H, Ray D, Chan ET, Hughes TR, Morris Q. 2010. RNAcontext: a new method for learning the sequence and structure binding preferences of RNA-binding proteins. *PLoS Comput. Biol.* 6:e1000832

38. Bahrami-Samani E, Penalva LOF, Smith AD, Uren PJ. 2015. Leveraging cross-link modification events in CLIP-seq for motif discovery. *Nucleic Acids Res.* 43(1):95–103
39. Cereda M, Pozzoli U, Rot G, Juvan P, Schweitzer A, et al. 2014. RNAmotifs: prediction of multivalent RNA motifs that control alternative splicing. *Genome Biol.* 15(1):R20
40. Rot G, Wang Z, Huppertz I, Modic M, Lenče T, et al. 2017. High-Resolution RNA Maps Suggest Common Principles of Splicing and Polyadenylation Regulation by TDP-43. *Cell Rep.* 19(5):1056–67
41. Wu X, Bartel DP. 2017. kpLogo: positional k-mer analysis reveals hidden specificity in biological sequences. *Nucleic Acids Res.*
42. Heller D, Krestel R, Ohler U, Vingron M, Marsico A. 2017. ssHMM: extracting intuitive sequence-structure motifs from high-throughput RNA-binding protein data. *Nucleic Acids Res.*
43. Polishchuk M, Paz I, Kohen R, Mesika R, Yakhini Z, Mandel-Gutfreund Y. 2017. A combined sequence and structure based method for discovering enriched motifs in RNA from in vivo binding data. *Methods.* 118-119:73–81
44. Dotu I, Adamson SI, Coleman B, Fournier C, Ricart-Altimiras E, et al. 2018. SARNaClust: Semi-automatic detection of RNA protein binding motifs from immunoprecipitation data. *PLoS Comput. Biol.* 14(3):e1006078
45. Maticzka D, Lange SJ, Costa F, Backofen R. 2014. GraphProt: modeling binding preferences of RNA-binding proteins. *Genome Biol.* 15(1):R17
46. Stražar M, Žitnik M, Zupan B, Ule J, Curk T. 2016. Orthogonal matrix factorization enables integrative analysis of multiple RNA binding proteins. *Bioinformatics.* 32(10):1527–35
47. Zhang S, Zhou J, Hu H, Gong H, Chen L, et al. 2016. A deep learning framework for modeling structural features of RNA-binding protein

targets. *Nucleic Acids Res.* 44(4):e32

48. Pan X, Shen H-B. 2017. RNA-protein binding motifs mining with a new hybrid deep learning based cross-domain knowledge integration approach. *BMC Bioinformatics.* 18(1):136
49. Pan X, Rijnbeek P, Yan J, Shen H-B. 2017. Prediction of RNA-protein sequence and structure binding preferences using deep convolutional and recurrent neural networks. *bioRxiv.* doi: 10.1101/146175
50. Li S, Dong F, Wu Y, Zhang S, Zhang C, et al. 2017. A deep boosting based approach for capturing the sequence binding preferences of RNA-binding proteins from high-throughput CLIP-seq data. *Nucleic Acids Res.*
51. Blin K, Dieterich C, Wurmus R, Rajewsky N, Landthaler M, Akalin A. 2015. DoRiNA 2.0--upgrading the doRiNA database of RNA interactions in post-transcriptional regulation. *Nucleic Acids Res.* 43(Database issue):D160–67
52. Hu B, Yang Y-CT, Huang Y, Zhu Y, Lu ZJ. 2017. POSTAR: a platform for exploring post-transcriptional regulation coordinated by RNA-binding proteins. *Nucleic Acids Res.* 45(D1):D104–14
53. Park JW, Jung S, Rouchka EC, Tseng Y-T, Xing Y. 2016. rMAPS: RNA map analysis and plotting server for alternative exon regulation. *Nucleic Acids Res.* 44(W1):W333–38
54. Fukunaga T, Ozaki H, Terai G, Asai K, Iwasaki W, Kiryu H. 2014. CapR: revealing structural specificities of RNA-binding protein target recognition using CLIP-seq data. *Genome Biol.* 15(1):R16
55. Wang T, Xie Y, Xiao G. 2014. dCLIP: a computational approach for comparative CLIP-seq analyses. *Genome Biol.* 15(1):R11
56. Yun J, Wang T, Xiao G. 2014. Bayesian hidden Markov models to identify RNA-protein interaction sites in PAR-CLIP. *Biometrics.* 70(2):430–40

57. Reyes-Herrera PH, Speck-Hernandez CA, Sierra CA, Herrera S. 2015. BackCLIP: a tool to identify common background presence in PAR-CLIP datasets. *Bioinformatics*. 31(22):3703–5
58. Hauer C, Curk T, Anders S, Schwarzl T, Alleaume A-M, et al. 2015. Improved binding site assignment by high-resolution mapping of RNA-protein interactions using iCLIP. *Nat. Commun*. 6:7921
59. Golumbeanu M, Mohammadi P, Beerenwinkel N. 2016. BMix: probabilistic modeling of occurring substitutions in PAR-CLIP data. *Bioinformatics*. 32(7):976–83
